# Supplementary material
Source: PubMed Central journal article supplement (PMC5685261)

**Supplemental figure legends**

**Supplemental figure 1. Microscopic pictures of blockage of a femoral lymphatic vessel.** (A) the femoral lymphatic vessel was blocked via the electrocauterization by electrocautery in the right hind limb of mouse (B) The only blue-stained lymphatic vessel was electrocauterized under a microscope.

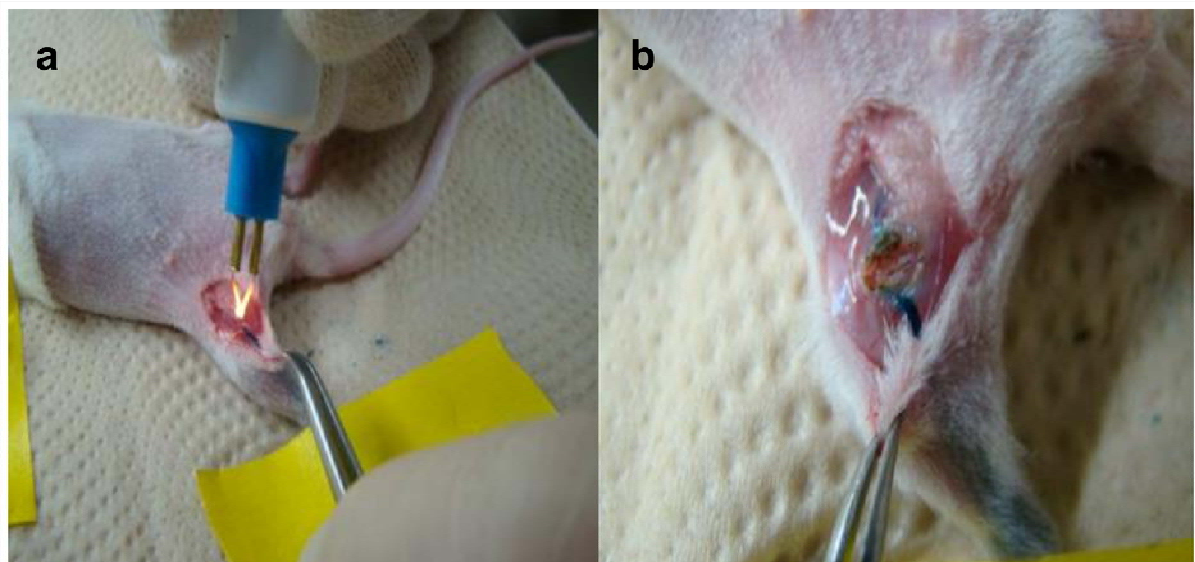

**Supplemental figure 2. The effect of hyaluronidase on expression of VEGFR-3 in lymphedematous tissues.** To assess expression of lymphatic endothelial cells, we performed western blotting for the VEGFR-3 proteins. Increased expression of the VEGFR-3 proteins in hyaluronidase-treated tissues over a time course. VEGFR-3 protein expression was detected as proteins of 130–kDa and 135–kDa. Densitometric analysis revealed that the expression of VEGFR-3 in the HYAL-LE group was 1.58 times and 9.73 times higher than in both PBS-LE and normal groups at post-operated 7 day, respectively. In HYAL-LE group, the expression of VEGFR-3 was gradually increased (normal vs HYAL-LE; 19.17 times, PBS-LE vs HYAL-LE; 1.88 times, on post-operated 21 day).

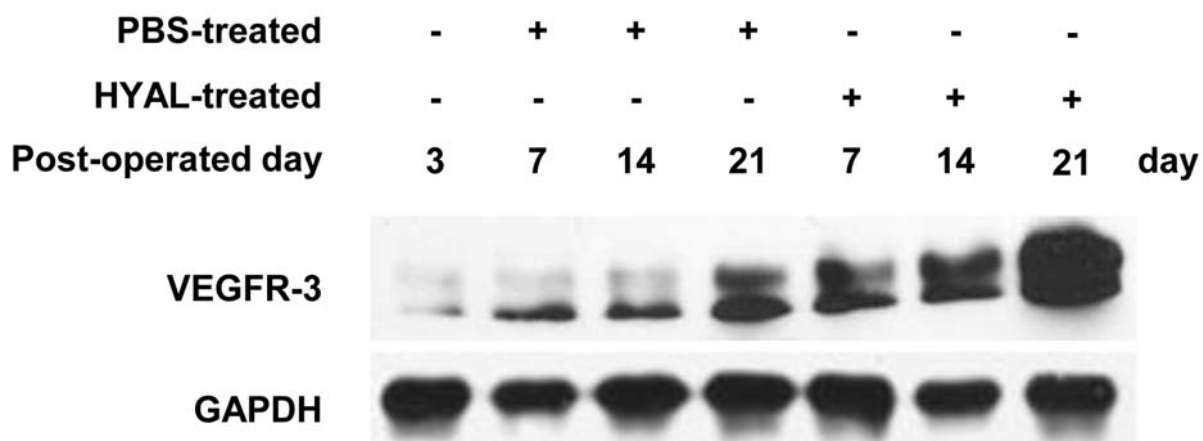

Supplement: EBM688570_supplementary_material.pdf [file EBM688570_supplementary_material.pdf]
